# Supplementary material
Source: PubMed Central journal article supplement (PMC283539)
Supplement: pnas_100_24_14024__2.pdf [file pnas_100_24_14024__2.pdf]

|               |                                                                                                    |      |
|---------------|----------------------------------------------------------------------------------------------------|------|
| Zebrafish S1P | ---MIVRLCLLVAFGLGAKLPLVGTTEEDSGPFLTPFPPLPLNADAHLSPNCSQLTLKLDL                                      | 57   |
| Human S1P     | MKLVNIWLLLLLVLLCGKHLGDRLEKK-----SFEKAPCPGCSHLLTKVEF                                                | 47   |
|               | : : * ** : : * . * . * . * . . : : . * : ** : : *                                                  |      |
| Zebrafish S1P | STQVVKHEYIVAFNGYFTAKARSDFISSALRDVDVAVKWRIVRRDNPASDYPDFEVVEIK                                       | 117  |
| Human S1P     | SSTVVEYEVYIVAFNGYFTAKARNSFISSALKSSEVDNWR IIPRNNPSSDYPDFEVIQIK                                      | 107  |
|               | * : * : : * ** : : * ** : : * . . * ** : : . : . * ** : * : ** : * ** : * ** : : * **              |      |
| Zebrafish S1P | QDTRNSLLTLQDHPYIKRVTQPQRMVLRSLKFTDSGTDGASPCNDTRWVQKWQSWQSSRPL                                      | 177  |
| Human S1P     | EKQKAGLLTLEDHPNIKRVTQPQKVFVRSLKYAES--DPTVPCNETRWSQKWQ---SSRPL                                      | 162  |
|               | : . : . * ** : * ** * ** * ** * * : * ** : : * * : * * : * ** * ** * ** * **                       |      |
| Zebrafish S1P | RRTSLSLSSGFWHATGRHSSRRLLRAI PRHVAQILQADVLWQMGTGSGVKVAVFDTGLS                                       | 237  |
| Human S1P     | RRASLSLSSGFWHATGRHSSRRLLRAI PRQVAQTLQADVLWQMGTGANVRVAVFDTGLS                                       | 222  |
|               | * * : * * * . * ** * ** * ** * ** * ** * ** * * : * * * ** * ** * ** : * : . * : * ** * ** * **    |      |
| Zebrafish S1P | EKHPHFKNVKERTNWTNEKTLDDGLGHTGFVAGVIASMRQCQGFAPDSELHIFRVFTNNQ                                       | 297  |
| Human S1P     | EKHPHFKNVKERTNWTNERLDDGLGHTGFVAGVIASMRQCQGFAPDAELHIFRVFTNNQ                                        | 282  |
|               | * ** * ** * ** * ** * ** * ** * ** * ** * ** * ** * ** * ** * ** * ** * ** * ** * ** * **          |      |
| Zebrafish S1P | VSYTSWFLDAFNAILKKIDVLNLSIGGPDFMDFVDFVQKVVWELTAKKIVIMVSAIGNDGPL                                     | 357  |
| Human S1P     | VSYTSWFLDAFNAILKKIDVLNLSIGGPDFMDFVDFVQKVVWELTANNVIMVSAIGNDGPL                                      | 342  |
|               | * ** * ** * ** * ** * ** * ** * ** * ** * ** * ** * ** * ** * ** * ** * ** * ** * ** * **          |      |
| Zebrafish S1P | YGTLLNPPADQMDVIGVGGIDFEDNIARFSSRGMTTWELPGGYGRVVKPDIIVTYGSGVRS                                      | 417  |
| Human S1P     | YGTLLNPPADQMDVIGVGGIDFEDNIARFSSRGMTTWELPGGYGRMVKPDIIVTYGAGVRS                                      | 402  |
|               | * ** * ** * ** * ** * ** * ** * ** * ** * ** * ** * ** * ** * ** * ** * ** * ** * ** * **          |      |
| Zebrafish S1P | LKEGCRSLSGT SVASPVVAGAVTLLASTVLNRELVNVPASMKQALIASARRLPGVMNFEOG                                     | 477  |
| Human S1P     | VKGGCRALSGT SVASPVVAGAVTLLVSTVQKRELVNVPASMKQALIASARRLPGVMNFEOG                                     | 462  |
|               | : * * * : * ** * ** * ** * ** * ** * ** * * : * ** * ** * ** * ** * ** * ** * ** * **              |      |
| Zebrafish S1P | HGKLDLLRAYQILNSYKQASLSPSYIDLTECPYMWPYCSQPIYYGMPPTVNVNVTILNGM                                       | 537  |
| Human S1P     | HGKLDLLRAYQILNSYKQASLSPSYIDLTECPYMWPYCSQPIYYGMPPTVNVNVTILNGM                                       | 522  |
|               | * ** * ** * ** * ** * ** * ** * ** * ** * ** * ** * ** * ** * ** * ** * ** * ** * ** * **          |      |
| Zebrafish S1P | GVTGRIVEKPIWQPYLPQNGDYVDVAVSYSPVLWVWAGYLAVSISVAKKAASWEGIAQGH                                       | 597  |
| Human S1P     | GVTGRIVDKPDWQPYLPQNGDNI EVAFSYSSVLWVWAGYLAVSISVTKKAASWEGIAQGH                                      | 582  |
|               | * ** * ** : * * * ** * ** * ** * ** * * : * * * * * * : * ** * ** * ** * ** * ** * ** * **         |      |
| Zebrafish S1P | VMVTVASPAENDSAIGGEMTSTVKLPVKVKIVPTPPRSKRILWDQYHNLRYPGGYFPRDN                                       | 657  |
| Human S1P     | VMITVASPAETESKNGAEQTSTVKLPKVKIIPTPRSKRVLWDQYHNLRYPGGYFPRDN                                         | 642  |
|               | * * : * ** * ** . : * . * * * ** * ** * ** * ** * ** * ** * ** * ** * ** * ** * ** * ** * **       |      |
| Zebrafish S1P | LRMKNDPLDWDNGDHIHTNFRDMYQHLRSMGYFVEVLGAPITCFDASQYGTLLMVDSEEEY                                      | 717  |
| Human S1P     | LRMKNDPLDWDNGDHIHTNFRDMYQHLRSMGYFVEVLGAPFTCFDASQYGTLLMVDSEEEY                                      | 702  |
|               | * ** * ** * ** * ** * ** * ** * ** * ** * ** * ** * ** * ** * ** * ** * ** * ** * ** * **          |      |
| Zebrafish S1P | FPEEITKLRDRIDNGLSLVIFSDWYNTSVMRKVKFYDENTRQWMPDGTGGANVPALNDLI                                       | 777  |
| Human S1P     | FPEEIAKLRRDNDNGLSLVIFSDWYNTSVMRKVKFYDENTRQWMPDGTGGANIPALNELL                                       | 762  |
|               | * ** * : * ** * ** : * ** * ** : : * ** * ** * ** * ** * ** * ** * ** * ** * ** * ** * ** * **     |      |
| Zebrafish S1P | SVWGMASFSDGLYEGDFTLADHDMYYASGCSIAKFPEDGIVIAQTLKDQGLEVLKQETAVV                                      | 837  |
| Human S1P     | SVWNMGFSDFGLYEGEFTLANHDMYYASGCSIAKFPEDGVVITQTFKDQGLEVLKQETAVV                                      | 822  |
|               | * * * . * . * ** * ** * ** * ** * ** * ** * ** * ** * ** * ** * ** * ** * ** * ** * ** * **        |      |
| Zebrafish S1P | ENVPVLGLYQTPSDGGRIALYGDNSCIDDShRQKDCFwLLDALLQYTSYSMTPPSLTHS                                        | 897  |
| Human S1P     | ENVPILGLYQIPAEGGRIVLYGDNSCLDDShRQKDCFwLLDALLQYTSYGVTTPPSLSHS                                       | 882  |
|               | * ** * : * ** * ** * : : * ** * ** . * ** * ** : * ** * ** * ** * ** * ** * ** * ** * ** * **      |      |
| Zebrafish S1P | KNRLVPPGTDRPLPQRLLEGNHLYRYSKVL EAH LGDPKPRPLPACPHLSWAKPQPLNETA                                     | 957  |
| Human S1P     | GNRQRPPSAGSVTPERMEGNHLHRYSKVL EAH LGDPKPRPLPACPRLSWAKPQPLNETA                                      | 942  |
|               | * * * * * : * . * : * : * * ** * ** * ** * ** * ** * ** * ** * ** * ** * ** * ** * ** * **         |      |
| Zebrafish S1P | PSNLWKHQKLLSVDMDKVVLPNVRAYRPQVRPLSPGESGAWDIPGGIMPGRYNQEVGQTI                                       | 1017 |
| Human S1P     | PSNLWKHQKLLSIDLDKVVLPNFRSNRPQVRPLSPGESGAWDIPGGIMPGRYNQEVGQTI                                       | 1002 |
|               | * ** * ** * ** * ** * : * : * ** * ** * . : * ** * ** * ** * ** * ** * ** * ** * ** * ** * ** * ** |      |
| Zebrafish S1P | PMFAFLGAMVVL SFFVQITKAKSKPKRRKPRVKRPLYLQQQQQQQTPHSGKNPTV                                           | 1074 |
| Human S1P     | PVFAFLGAMVVL AFFVQIN KAKSRPKRRKPRVKRPLMQQ-----VHPKTPSV                                             | 1052 |
|               | * : * ** * ** * ** * : * ** * ** * ** * ** * ** * ** * ** * ** * ** * * . * . * : *                |      |
