# Supplementary material
Source: PubMed Central journal article supplement (PMC283539)

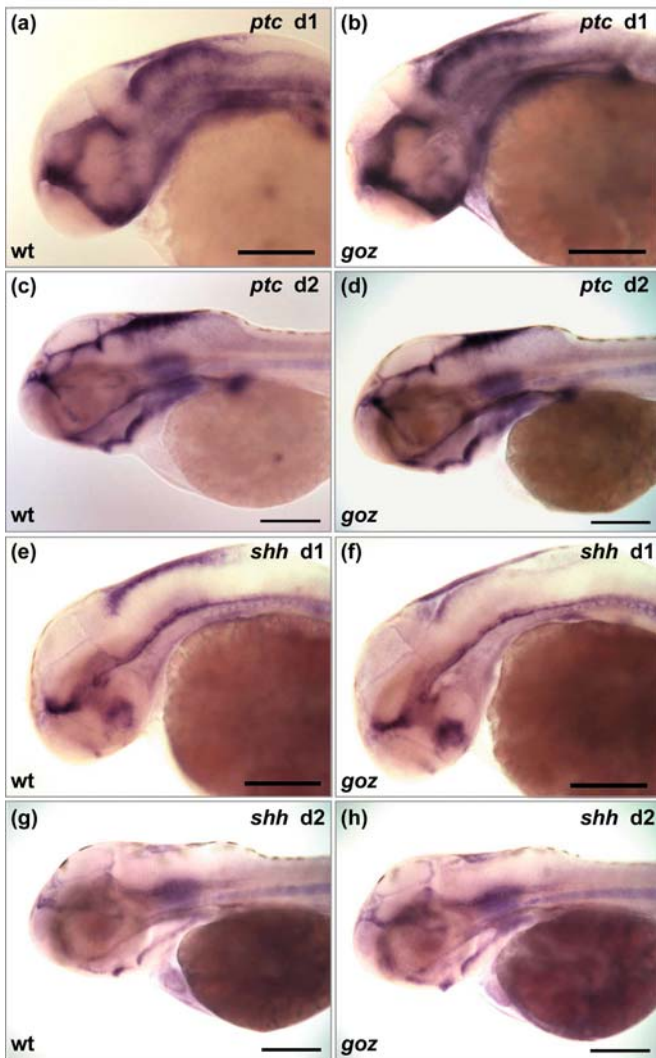

Supplement: pnas_100_24_14024__4.pdf [file pnas_100_24_14024__4.pdf]

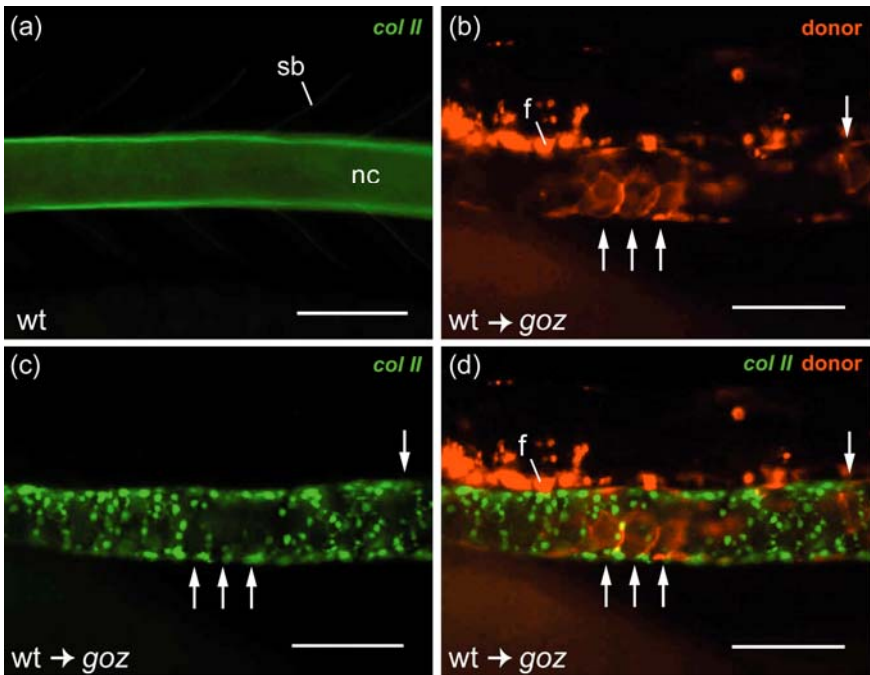

Supplement: pnas_100_24_14024__6.pdf [file pnas_100_24_14024__6.pdf]
